# Supplementary material for: A Risk Management Framework for User-Generated Content on Public Display Systems
Source: Hindawi journal article supplement (doi:10.1155/2019/9769246), 2019-03-03
Supplement: f1 [file 9769246.f1.pdf]

## Supplementary Materials

This is the list of the 26 references used as input in the coding process in which we aim to identify risks and moderation approaches, when opening public displays to publication of user generated content.

---

### List of References

---

- Florian Alt, Thomas Kubitz, Dominik Bial, et al. 2011. Digifieds - Insights into Deploying Digital Public Notice Areas in the Wild. Proceedings of the 10th International Conference on Mobile and Ubiquitous Multimedia Pages (MUM'11): 165–174. <http://doi.org/10.1145/2107596.2107618>
- 
- Florian Alt, Nemanja Memarovic, Ivan Elhart, Dominik Bial, and Albrecht Schmidt. 2011. Designing shared public display networks: implications from today's paper-based notice areas. *Pervasive*: 258–275. Retrieved May 25, 2012 from <http://dl.acm.org/citation.cfm?id=2021975.2021999>
- 
- Florian Alt, Nemanja Memarovic, Miriam Greis, and Niels Henze. 2014. UniDisplay - A research prototype to investigate expectations towards public display applications. 2014 IEEE International Conference on Pervasive Computing and Communication Workshops, PERCOM WORKSHOPS 2014, 519–524. <http://doi.org/10.1109/PerComW.2014.6815260>
- 
- Ivan Elhart, Marc Langheinrich, Nigel Davies, and Rui Jose. 2013. Key challenges in application and content scheduling for Open Pervasive Display Networks. 2013 IEEE International Conference on Pervasive Computing and Communications Workshops, PerCom Workshops 2013, 393–396. <http://doi.org/10.1109/PerComW.2013.6529524>
- 
- Ivan Elhart, Nemanja Memarovic, Marc Langheinrich, and Elisa Rubegni. 2013. Control and Scheduling Interface for Public Displays. Adjunct Proceedings of the International Conference on Pervasive and Ubiquitous Computing (UbiComp'13), 51–54. <http://doi.org/10.1145/2494091.2494106>
- 
- Jorge Goncalves, Simo Hosio, Denzil Ferreira, and Vassilis Kostakos. 2014. Game of words: tagging places through crowdsourcing on public displays. Proceedings of the 2014 conference on Designing interactive systems - DIS '14: 705–714. <http://doi.org/10.1145/2598510.2598514>
- 
- Miriam Greis, Florian Alt, Niels Henze, and Nemanja Memarovic. 2014. I Can Wait a Minute: Uncovering the Optimal Delay Time for Pre-moderated User-generated Content on Public Displays. Proceedings of the Conference on Human Factors in Computing Systems (CHI'14), 1435–1438. <http://doi.org/10.1145/2556288.2557186>
- 
- Simo Hosio, Vassilis Kostakos, Hannu Kukka, Marko Jurmu, Jukka Riekk, and Timo Ojala. 2012. From School Food to Skate Parks in a Few Clicks: Using Public Displays to Bootstrap Civic Engagement of the Young. Lecture Notes in Computer Science (including subseries Lecture Notes in Artificial Intelligence and Lecture Notes in Bioinformatics), 425–442. [http://doi.org/10.1007/978-3-642-31205-2\\_26](http://doi.org/10.1007/978-3-642-31205-2_26)
- 
- Simo Hosio, Hannu Kukka, Marko Jurmu, Timo Ojala, and Jukka Riekk. 2010. Enhancing interactive public displays with social networking services. Proceedings of the 9th International Conference on Mobile and Ubiquitous Multimedia - MUM '10: 1–9. <http://doi.org/10.1145/1899475.1899498>
- 
- Simo Hosio, Hannu Kukka, and Jukka Riekk. 2010. Social surroundings: Bridging the virtual and physical divide. *IEEE Multimedia* 17, 2: 26–33. <http://doi.org/10.1109/MMUL.2010.3>
- 
- Nemanja Memarovic, Ivan Elhart, and Marc Langheinrich. 2011. FunSquare: First Experiences with Autopoiesic Content. Proceedings of the 10th International Conference on Mobile and Ubiquitous Multimedia (MUM '11), 175–184. <http://doi.org/10.1145/2107596.2107619>
- 
- Nemanja Memarovic, Marc Langheinrich, Keith Cheverst, Nick Taylor, and Florian Alt. 2013. P-LAYERS -- A Layered Framework Addressing the Multifaceted Issues Facing Community-Supporting Public Display Deployments. *ACM Transactions on Computer-Human Interaction* 20, 3: 1–34. <http://doi.org/10.1145/2491500.2491505>
- 
- Nick Taylor, Keith Cheverst, Dan Fitton, Nicholas J. P. Race, Mark Rouncefield, and Connor Graham. 2007. Probing Communities: Study of a Village Photo Display. Proceedings of the 19th Australasian conference on Computer-Human Interaction: Entertaining User Interfaces (OzCHI'07), 17–24. <http://doi.org/10.1145/1324892.1324896>
-

- 
- Rui José, Hélder Pinto, Bruno Silva, and Ana Melro. 2013. Pins and Posters: Paradigms for Content Publication on Situated Displays. *IEEE Computer Graphics and Applications* 33, 2: 64–72.
- 
- Churchill, E.F., Nelson, L., Denoue, L., Murphy, P., and Helfman, J.I. The Plasma Poster Network: Social Hypermedia on Public Display. In K. O'Hara, ed., *Public and Situated Displays Social and Interactional Aspects of Shared Display Technologies*. Kluwer Academic Publishers, London, 2003, 233–260.
- 
- Memarovic, N. Public Photos , Private Concerns : Uncovering Privacy Concerns of User Generated Content Created Through Networked Public Displays. *Proceedings of the 4th ACM International Symposium on Pervasive Displays*, (2015).
- 
- Melro, A., Silva, B., and José, R. Media sharing in situated displays: Service design lessons from existing practices with paper leaflets. *Lecture Notes in Business Information Processing*, (2013).
- 
- Hara, K.O., Lipson, M., Jansen, M., et al. Jukola : Democratic Music Choice in a Public Space.
- 
- Jose, R., Otero, N., Izadi, S., et al. Instant Places: Using Bluetooth for Situated Interaction in Public Displays. *IEEE Pervasive Computing* 7, 4 (2008), 52–57.
- 
- Davies, N., Langheinrich, M., José, R., Schmidt, A.: Open display networks: A communications medium for the 21st century. *Computer* (Long. Beach. Calif). 45, 58–64 (2012).
- 
- Coutinho, P., José, R.: Design Sensitivities From Public Expression Practices with Non-Digital Displays. In: *Proceedings of the 4th International Symposium on Pervasive Displays (PerDis'15)*. pp. 139–145 (2015).
- 
- Storz, O., Friday, A., Davies, N., Finney, J., Sas, C., Sheridan, J.: Public ubiquitous computing systems: Lessons from the e-campus display deployments. *Ieee Pervasive Comput.* 5, 40–47 (2006).
- 
- Rogers, Y., Brignull, H.: Subtle ice-breaking: encouraging socializing and interaction around a large public display. *CSCW02 Work. Proc.* 1–6 (2002).
- 
- Finke, M., Tang, A., Leung, R., Blackstock, M.: Lessons Learned: Game Design for Large Public Displays. In: *3rd international conference on Digital Interactive Media in Entertainment and Arts*. pp. 26–33. , New York, NY, USA (2008).
- 
- S. Clinch, N. Davies, T. Kubitz, and A. Friday, “Ownership and Trust in Cyber-Foraged Displays,” *Proc. Int. Symp. Pervasive Displays - PerDis '14*, pp. 168–173, 2014.
- 
- N. Wouters, J. Huyghe, and A. Vande Moere, “OpenWindow - Citizen-Controlled Content on Public Displays,” *Proc. 2nd Int. Symp. Pervasive Displays*, pp. 121–126, 2013.
-
